# Supplementary material for: Robust stratification of breast cancer subtypes using differential patterns of transcript isoform expression
Source: PLoS Genet. 2017 Mar 6;13(3):e1006589. doi: 10.1371/journal.pgen.1006589 (PMC5367891; doi:10.1371/journal.pgen.1006589)
Supplement: S1 Table — (XLS) [file pgen.1006589.s013.xls]

## Sheet: Sheet1
Supplementary Table 1: Sample Demographics University of Chicago Cohort
Sample	SBR Grade	ER	PR	Her2Neu	Age (+/- 5 years)	Race	Tumor Stage	Node Status	ATCC Stage
BRCA1	II	pos	pos	neg	86	AA	T3	N0	IIB
BRCA2	II	pos	neg	neg	90	AA	T2	N0	IIA
BRCA3	II	pos	pos	neg	60	EA	T3	N1	IIIA
BRCA4	II	pos	pos	neg	89	EA	T2	N1	IIA
BRCA5	II	pos	neg	neg	46	EA	T2	N0	IIA
BRCA6	II	pos	pos	neg	37	AA	T1c	N2	IIIA
BRCA7	II	pos	pos	neg	44	EA	T2	N1	IIA
BRCA8	II	pos	pos	neg	54	EA	T1c	N2	IIIA
BRCA9	II	pos	pos	neg	44	AA	T2	N1a	IIB
BRCA10	II	pos	pos	neg	61	EA	T1c	N0	IA
BRCA11	II	pos	neg	neg	66	EA	T2	N0	IIA
TNBC1	III	neg	neg	neg	71	AA	T2	N1a	IIA
TNBC2	III	neg	neg	neg	35	EA	T2	N0	IIA
TNBC3	III	neg	neg	neg	47	AA	T1c	N0	IA
TNBC4	III	neg	neg	neg	75	AA	T2	N0	IIA
TNBC5	III	neg	neg	neg	54	EA	T2	N0	IIA
TNBC6	III	neg	neg	neg	55	EA	T4	N1a	IIIB
TNBC7	III	neg	neg	neg	39	EA	T1	N1	IIA
TNBC8	III	neg	neg	neg	36	EA	T4	N0	IIIB
TNBC9	III	neg	neg	neg	41	EA	T2	N1	IIA
TNBC10	III	neg	neg	neg	55	AA	T2	N0	IIA
TNBC11	III	neg	neg	neg	33	EA	T2	N0	IIA
TNBC12	III	neg	neg	neg	75	AA	T2	N0	IIA
TNBC13	III	neg	neg	neg	83	AA	T3	N1	IIIA
TNBC14	III	neg	neg	neg	46	EA	T1c	N0	IA
